# Supplementary material
Source: PubMed Central journal article supplement (PMC7574931)
Supplement: mmc1.pdf [file mmc1.pdf]

# THE LANCET

## Healthy Longevity

### Supplementary appendix

This appendix formed part of the original submission and has been peer reviewed. We post it as supplied by the authors.

Supplement to: Burton JK, Bayne G, Evans C, et al. Evolution and effects of COVID-19 outbreaks in care homes: a population analysis in 189 care homes in one geographical region of the UK. *Lancet Healthy Longev* 2020; **1**: e21–31.

# **Understanding the evolution of COVID-19 outbreaks in care homes: population analysis in a moderate incidence UK region**

## **Appendix: supplementary figures and table**

### **Corresponding author**

Bruce Guthrie, Professor of General Practice, Director Advanced Care Research Centre, Doorway 3, Old Medical School, Teviot Place, Edinburgh EH8 9AG.

[bruce.guthrie@ed.ac.uk](mailto:bruce.guthrie@ed.ac.uk)

Supplementary figure 1: Estimated Dissemination Ratio (EDR)\*

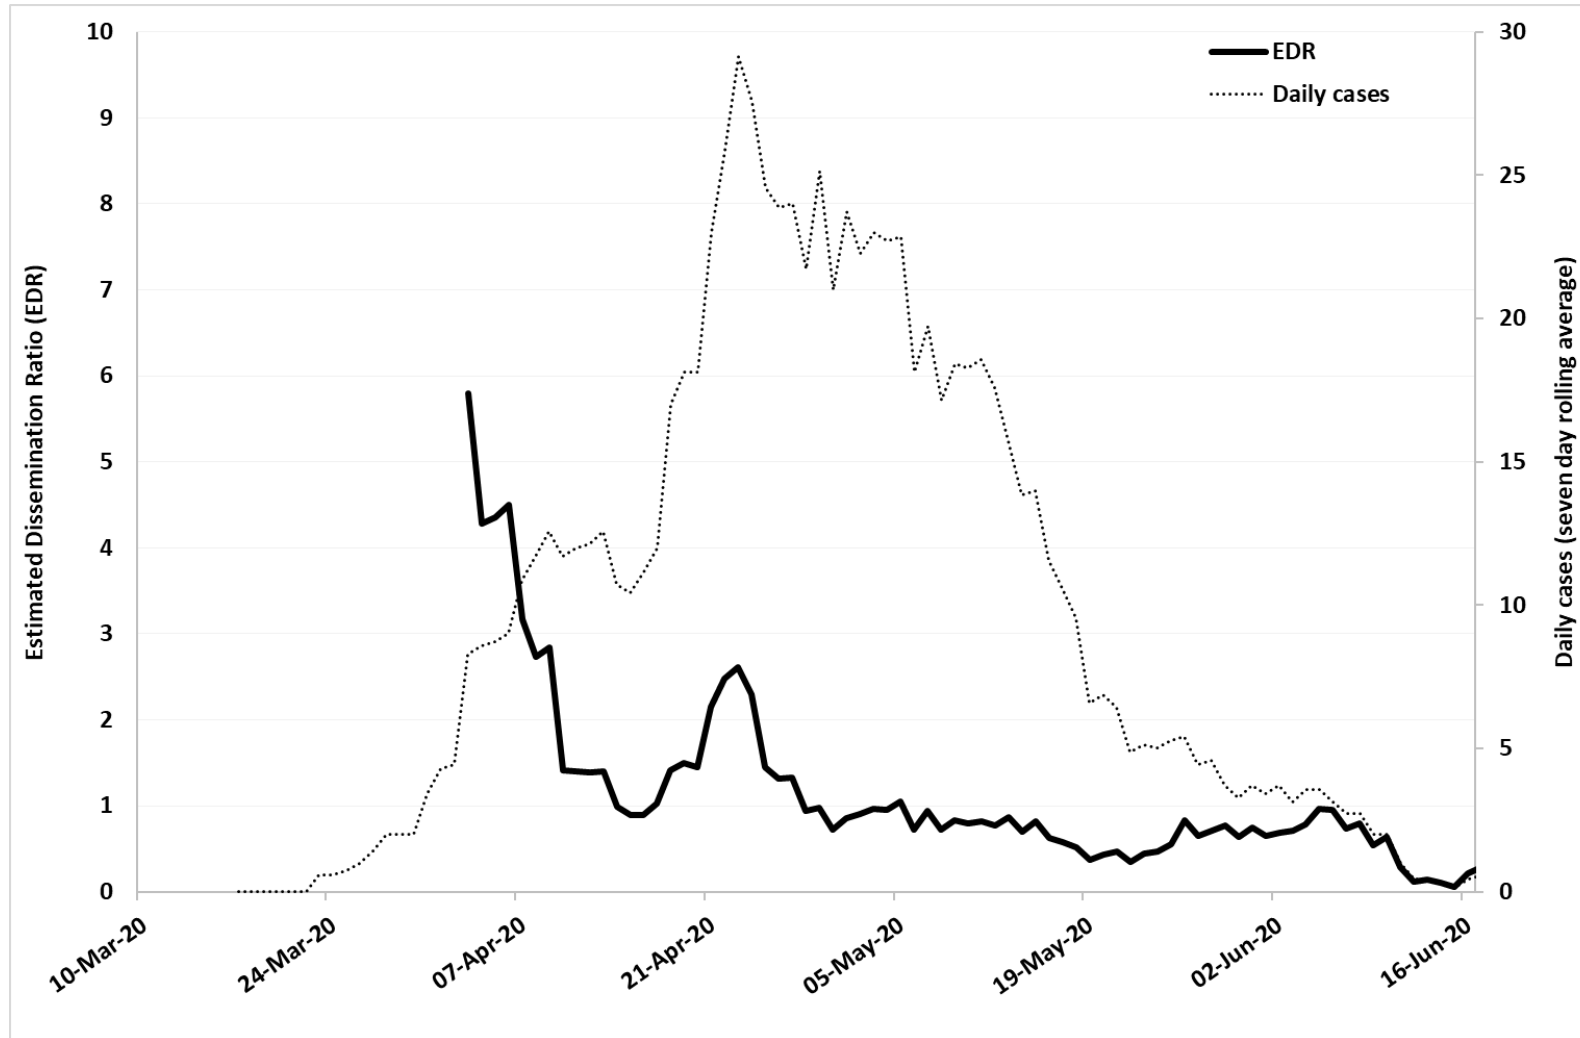

\* Only shown to mid-June (EDR is unstable when incidence is very low)

Supplementary figure 2: Deaths of care-home residents in care-homes (all care-homes combined)

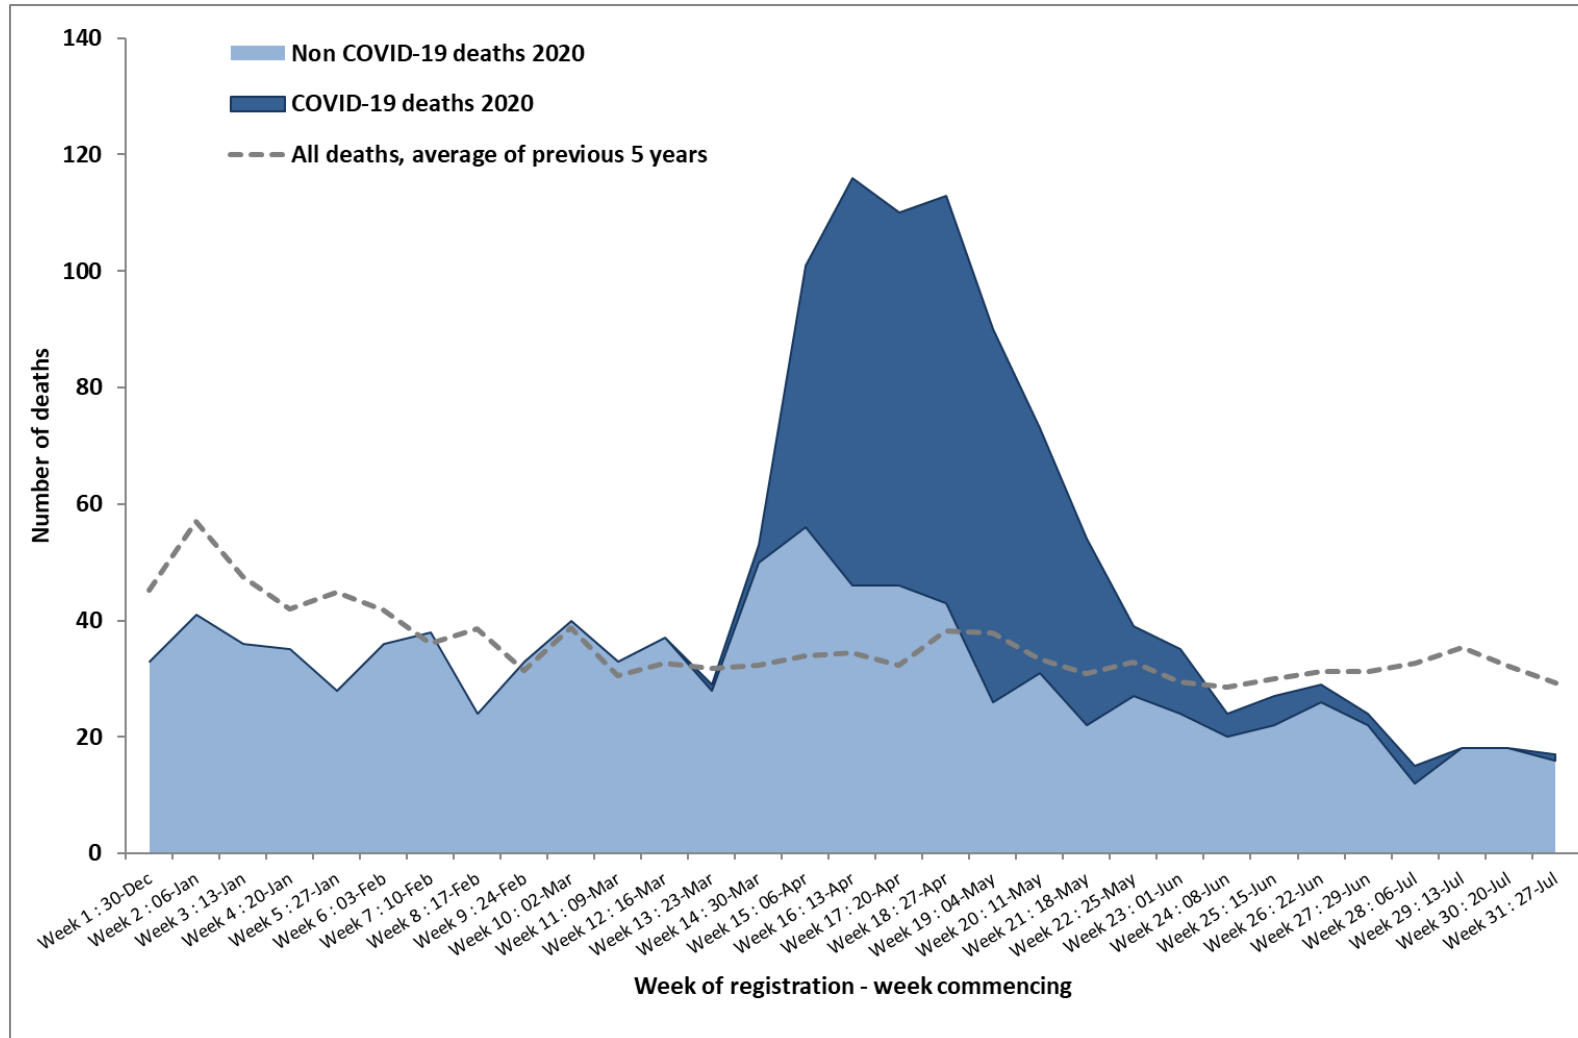

Supplementary table 1: Logistic regression analysis of characteristics of care homes associated with the presence of an outbreak

| Care-home characteristics (no. of care-homes, no. of beds) | No. (%) with an outbreak<br>N=189 care-homes | Univariate OR (95% CI) | Adjusted OR (95% CI) |
|------------------------------------------------------------|----------------------------------------------|------------------------|----------------------|
| No. of beds (per 20 bed increase)                          | -                                            | 5.04 (3.28 to 7.73)    | 3.59 (2.18 to 5.90)  |
| Care home type                                             |                                              |                        |                      |
| Other care home services (5227 beds)                       | 66/109 (61%)                                 | Reference              | Reference            |
| Older people (616 beds)                                    | 3/80 (4%)                                    | 0.02 (0.01 to 0.09)    | 0.21 (0.05 to 0.87)  |
| Regulatory risk assessment score <sup>#</sup>              |                                              |                        |                      |
| Low (3236 beds)                                            | 40/131 (31%)                                 | Reference              | NS                   |
| Medium (1201 beds)                                         | 12/31 (39%)                                  | 1.44 (0.64 to 3.24)    |                      |
| High (1346 beds)                                           | 16/26 (62%)                                  | 3.64 (1.52 to 8.72)    |                      |
| Ownership                                                  |                                              |                        |                      |
| Private (3954 beds)                                        | 43/98 (44%)                                  | Reference              | NS                   |
| Voluntary or not for profit (1003 beds)                    | 16/37 (43%)                                  | 0.98 (0.45 to 2.09)    |                      |
| Local authority (886 beds)                                 | 10/54 (19%)                                  | 0.29 (0.13 to 0.64)    |                      |
| No. of other types of outbreak in last 6 years             |                                              |                        |                      |
| None (1177 beds)                                           | 9/94 (10%)                                   | Reference              | NS                   |
| 1-4 (2636 beds)                                            | 35/64 (55%)                                  | 11.4 (4.90 to 26.5)    |                      |
| 5 or more (2030 beds)                                      | 25/31 (81%)                                  | 39.4 (12.8 to 121.2)   |                      |
| Locality                                                   |                                              |                        |                      |
| Locality 1 (3547 beds)                                     | 42/103 (41%)                                 | Reference              | NS                   |
| Locality 2 (708 beds)                                      | 9/23 (39%)                                   | 0.93 (0.37 to 2.36)    |                      |
| Locality 3 (594 beds)                                      | 7/18 (39%)                                   | 0.92 (0.33 to 2.58)    |                      |
| Locality 4 (994 beds)                                      | 11/45 (24%)                                  | 0.47 (0.21 to 1.03)    |                      |

\* NS not significant
